# Supplementary material for: Synthesis, Characterization and Photocatalytic Activity of CoFe2O4/Fe2O3 Dispersed in Mesoporous KIT-6
Source: MDPI journal article supplement (doi:10.3390/nano12203566), 2022-10-12
Supplement: s1 [file s1]

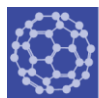

## Supplementary Materials

# Synthesis, Characterization and Photocatalytic Activity of $\text{CoFe}_2\text{O}_4/\text{Fe}_2\text{O}_3$ Dispersed in Mesoporous KIT-6

Johnatan de Oliveira Soares <sup>1</sup>, Wesley Eulálio Cabral Cavalcanti <sup>1</sup>, Marco Antonio Morales Torres <sup>2</sup>, Sibebe Berenice Castella Pergher <sup>1</sup>, Fernando José Volpi Eusébio De Oliveira <sup>1</sup> and Tiago Pinheiro Braga <sup>1,\*</sup>

<sup>1</sup> Instituto de Química Laboratório de Peneiras Moleculares (LABPEMOL), Instituto de Química, Universidade Federal do Rio Grande do Norte, Natal 59078-970, RN, Brazil

<sup>2</sup> Departamento de Física Teórica e Experimental, Universidade Federal do Rio Grande do Norte, Natal 59078-970, RN, Brazil

\* Correspondence: tiago.braga@ufrn.br; Tel.: +55-8433422323 (code:108)

**Citation:** Soares, J.d.O.; Cavalcanti, W.E.C.; Torres, M.A.M.; Pergher, S.B.C.; De Oliveira, F.J.V.E.; Braga, T.P. Synthesis, Characterization and Photocatalytic Activity of  $\text{CoFe}_2\text{O}_4/\text{Fe}_2\text{O}_3$  Dispersed in Mesoporous KIT-6. *Nanomaterials* **2022**, *12*, 3566. <https://doi.org/10.3390/nano12203566>

Received: 29 August 2022

Accepted: 6 October 2022

Published: 12 October 2022

**Publisher's Note:** MDPI stays neutral with regard to jurisdictional claims in published maps and institutional affiliations.

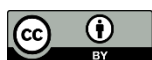

**Copyright:** © 2022 by the authors. Licensee MDPI, Basel, Switzerland. This article is an open access article distributed under the terms and conditions of the Creative Commons Attribution (CC BY) license (<https://creativecommons.org/licenses/by/4.0/>).

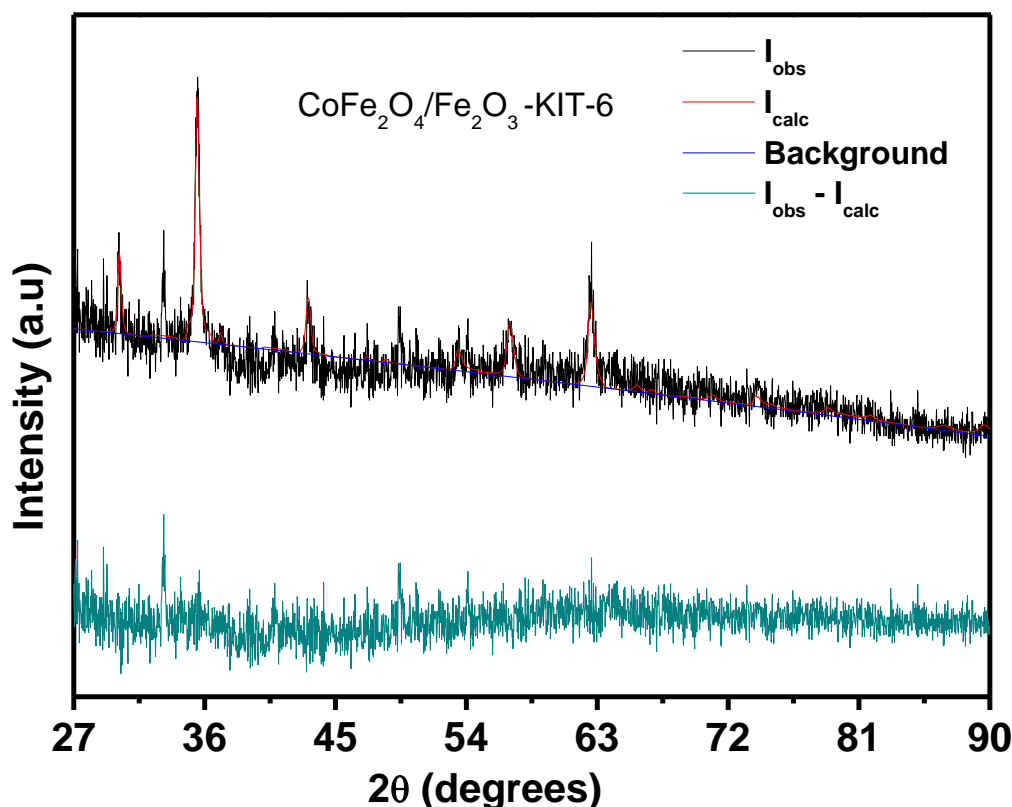

**Figure S1.** Rietveld refinement for the  $\text{CoFe}_2\text{O}_4/\text{Fe}_2\text{O}_3$ -KIT-6 solid.

**Table S1.** Mesoporous structure parameters: Interplanar distance( $D_{(211)}$ ) and mesoporous structure parameter for cubic structure ( $a_{0\text{cubic}}$ ).

| Sample                                                       | $D_{(211)}$ | $a_{0\text{cubic}}$ |
|--------------------------------------------------------------|-------------|---------------------|
| KIT-6                                                        | 9.014       | 22.079              |
| $\text{CoFe}_2\text{O}_4/\text{Fe}_2\text{O}_3\text{-KIT-6}$ | 8.429       | 20.646              |

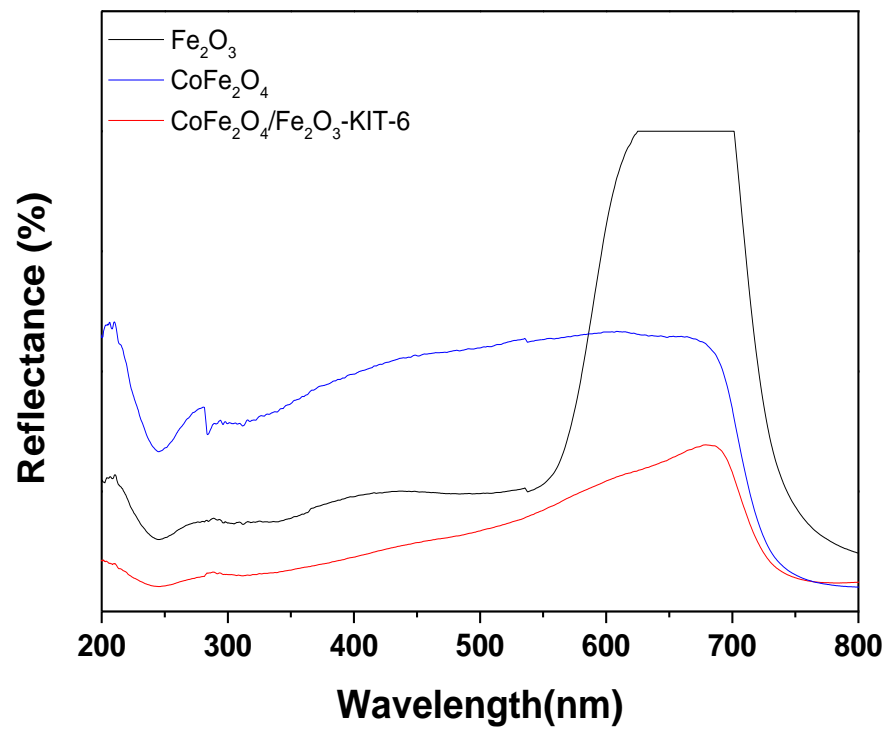

**Figure S2.** Diffuse reflectance spectra (DRS) of  $\text{CoFe}_2\text{O}_4/\text{Fe}_2\text{O}_3\text{-KIT-6}$  solid, pure  $\text{Fe}_2\text{O}_3$  and pure  $\text{CoFe}_2\text{O}_4$ .

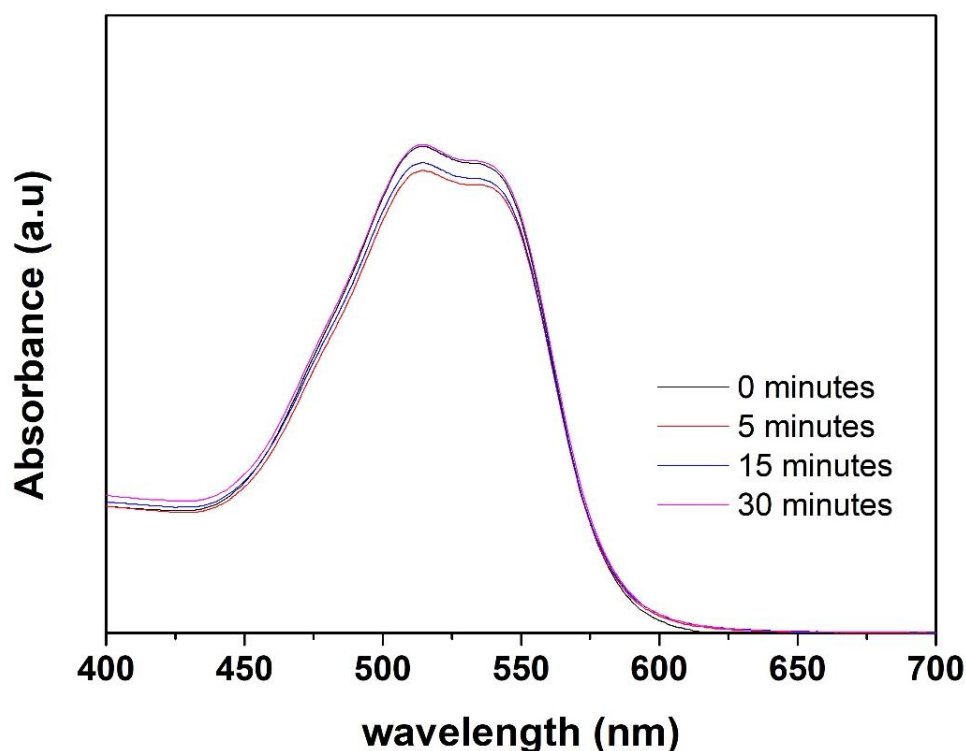

**Figure S3.** Dye adsorption in 30 min in the absence of light using CoFe<sub>2</sub>O<sub>4</sub>/Fe<sub>2</sub>O<sub>3</sub>-KIT-6 photocatalyst.

The anatase phase (TiO<sub>2</sub>) was added to the CoFe<sub>2</sub>O<sub>4</sub>/Fe<sub>2</sub>O<sub>3</sub>-KIT-6 catalyst to verify if there was an improvement in the degradation process compared to the solid proposed in the study. The XRD of the TiO<sub>2</sub>/CoFe<sub>2</sub>O<sub>4</sub>/Fe<sub>2</sub>O<sub>3</sub>-KIT-6 photocatalyst is described in Figure S4. The titanium oxide impregnation process was carried out successfully, forming anatase, in the proportion of 10% by mass, Figure S4. It was not possible to identify the Fe<sub>2</sub>O<sub>3</sub> phase, probably due to its low concentration and the increase in the number of phases present in the solid.

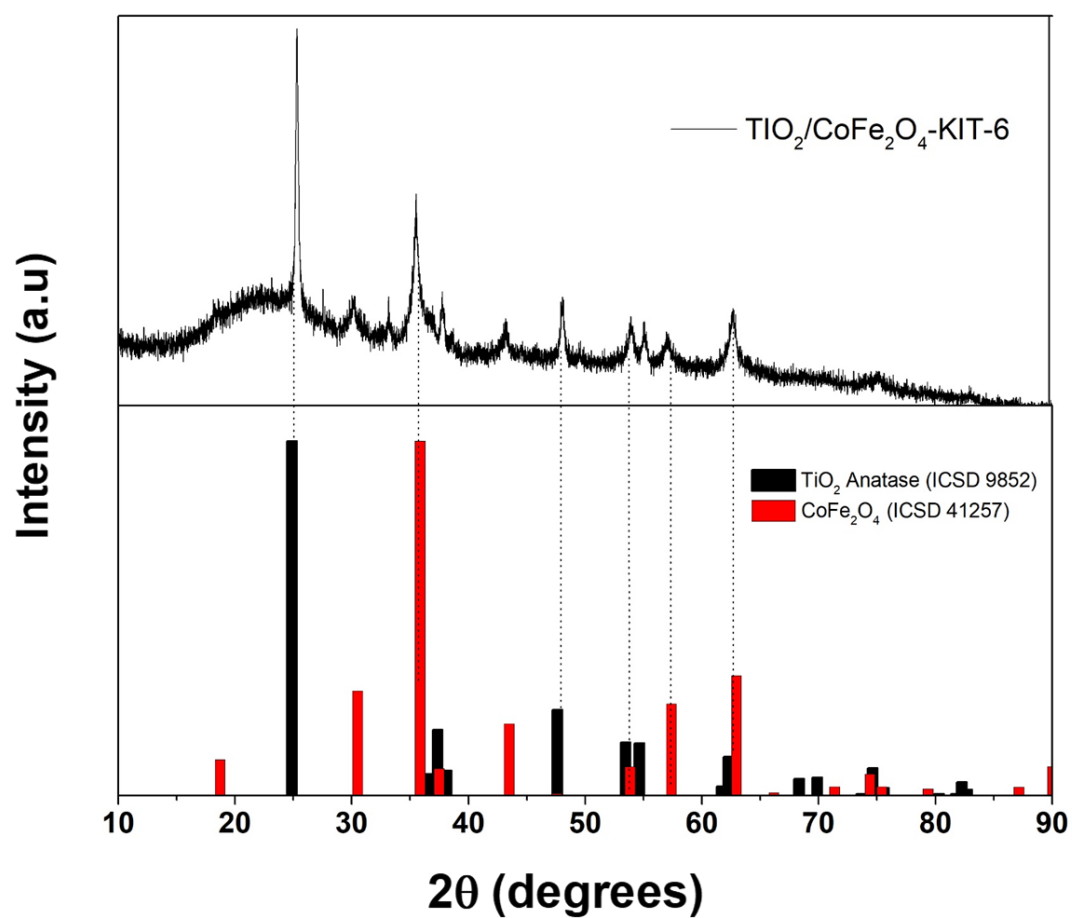

Figure S4. XRD result for the  $\text{TiO}_2/\text{CoFe}_2\text{O}_4/\text{Fe}_2\text{O}_3$ -KIT-6 photocatalyst.

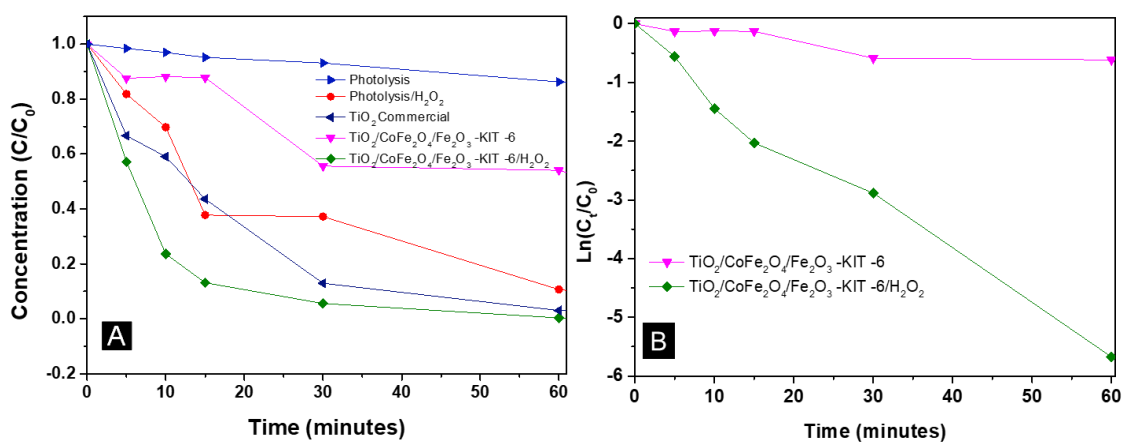

Figure S5. Tests for the  $\text{TiO}_2/\text{CoFe}_2\text{O}_4/\text{Fe}_2\text{O}_3$ -KIT-6 catalyst. (A) degradation of the URRD dye and (B) kinetic parameter of the reaction.

**Table S2.** Degradation rate and kinetic parameters for systems with TiO<sub>2</sub>/CoFe<sub>2</sub>O<sub>4</sub>/Fe<sub>2</sub>O<sub>3</sub>–KIT-6 for 1h of reaction.

| Sample                                                                                                                          | Degradation rate (%) | R <sup>2</sup> | k` (min-1) | t <sub>1/2</sub> (min) |
|---------------------------------------------------------------------------------------------------------------------------------|----------------------|----------------|------------|------------------------|
| TiO <sub>2</sub> /CoFe <sub>2</sub> O <sub>4</sub> /Fe <sub>2</sub> O <sub>3</sub> –KIT-6 without H <sub>2</sub> O <sub>2</sub> | 46                   | 0.96           | 0.00975    | 71.1                   |
| TiO <sub>2</sub> /CoFe <sub>2</sub> O <sub>4</sub> /Fe <sub>2</sub> O <sub>3</sub> –KIT-6 with H <sub>2</sub> O <sub>2</sub>    | 99                   | 0.97           | 0.09229    | 7.51                   |

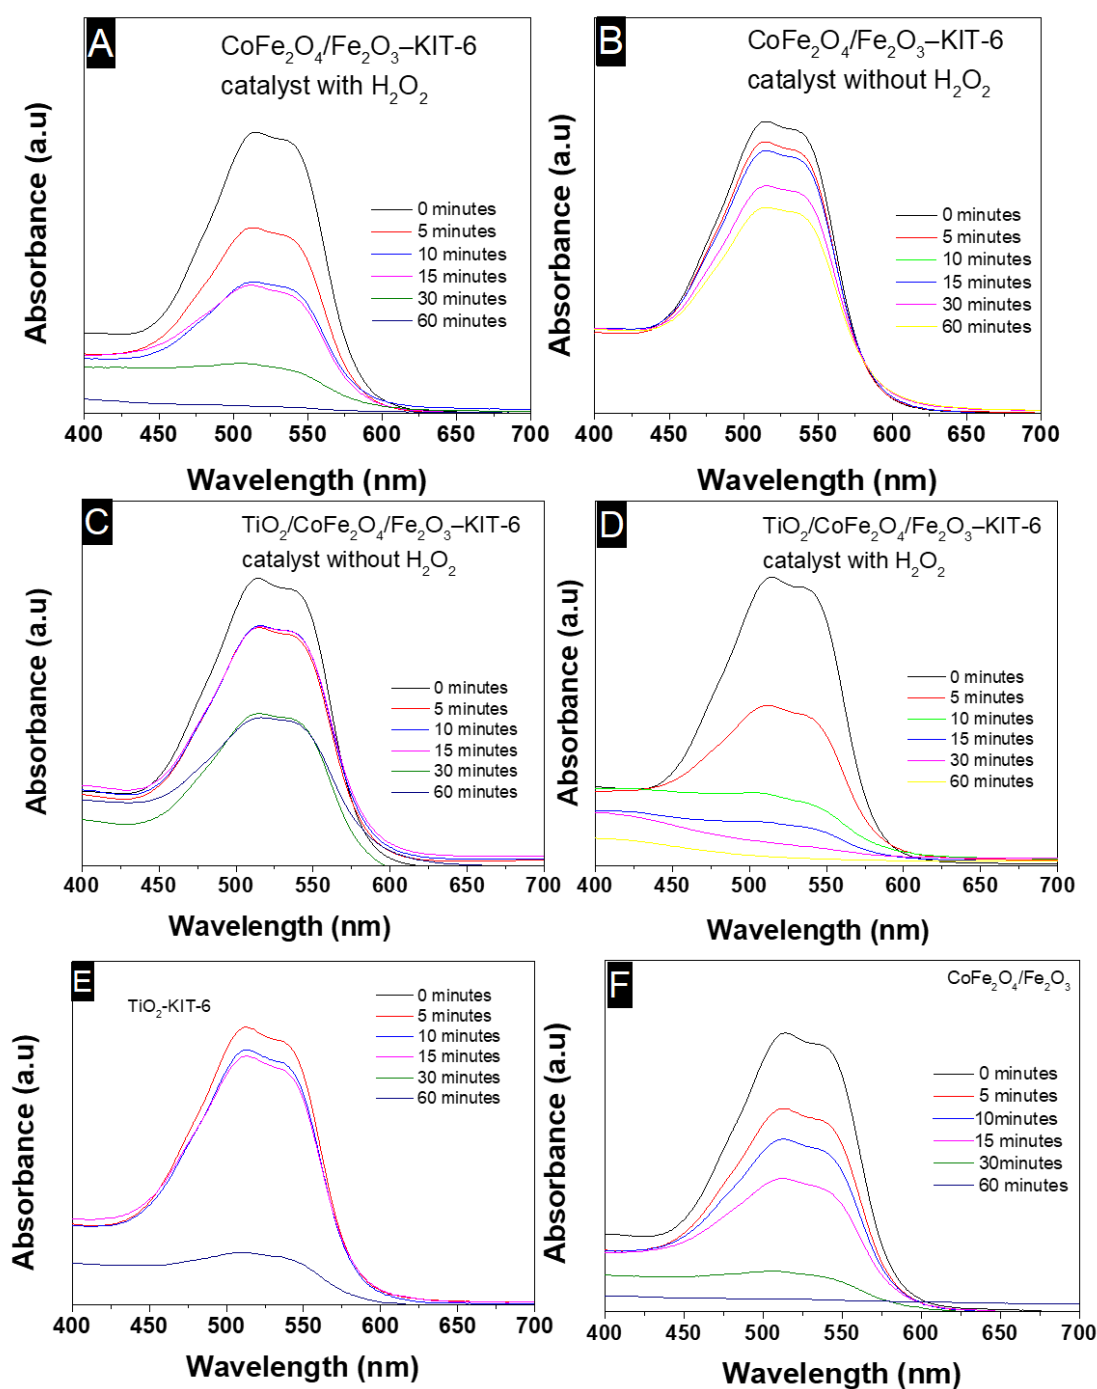

**Figure S6.** Degradation of the URRD dye. (A) CoFe<sub>2</sub>O<sub>4</sub>/Fe<sub>2</sub>O<sub>3</sub>-KIT-6 catalyst with H<sub>2</sub>O<sub>2</sub>; (B) CoFe<sub>2</sub>O<sub>4</sub>/Fe<sub>2</sub>O<sub>3</sub>-KIT-6 catalyst without H<sub>2</sub>O<sub>2</sub>; (C) TiO<sub>2</sub>/CoFe<sub>2</sub>O<sub>4</sub>/Fe<sub>2</sub>O<sub>3</sub>-KIT-6 catalyst without H<sub>2</sub>O<sub>2</sub>; (D) TiO<sub>2</sub>/CoFe<sub>2</sub>O<sub>4</sub>/Fe<sub>2</sub>O<sub>3</sub>-KIT-6 catalyst with H<sub>2</sub>O<sub>2</sub>; (E) TiO<sub>2</sub>/KIT-6 catalyst with H<sub>2</sub>O<sub>2</sub>; (F) CoFe<sub>2</sub>O<sub>4</sub>/Fe<sub>2</sub>O<sub>3</sub> solid with H<sub>2</sub>O<sub>2</sub>.

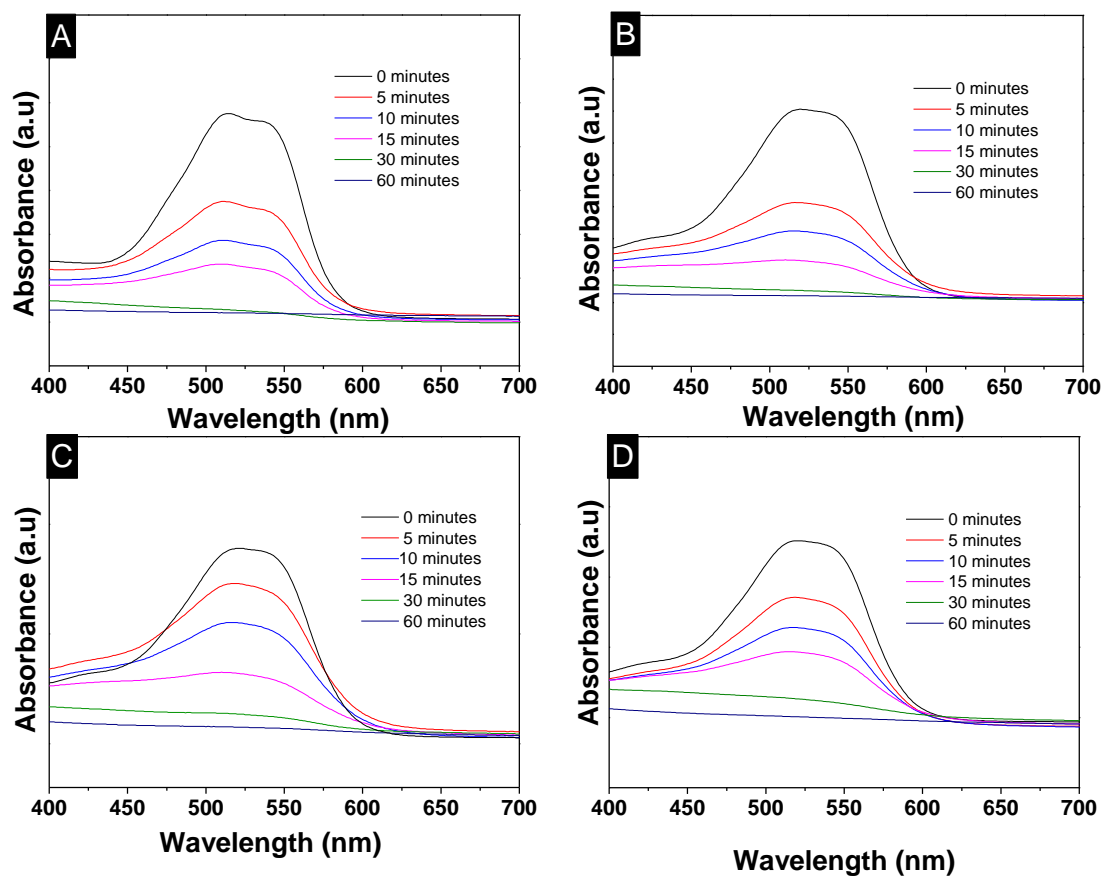

Figure S7. Photocatalyst reuse. (A) first cycle; (B) second cycle; (C) Third cycle; (D) fourth cycle.

Table S3. Possible by-products for the photocatalytic degradation of the URRD dye in 15 min of reaction.

| Major by-products             | Molecular Weight (g mol <sup>-1</sup> ) | Structure | % Similarity with NIST | Major ions       |
|-------------------------------|-----------------------------------------|-----------|------------------------|------------------|
| 1-Methyl - 3 -phenylindole    | 207                                     |           | 75                     | 96,133, 191, 207 |
| 2,4-Dimethylbenzo[h]quinoline | 207                                     |           | 74                     | 96,133, 191, 207 |
